# Supplementary material for: Evaluation of the Harvest Dates for Three Major Cultivars of Blue Honeysuckle (Lonicera caerulea L.) in China
Source: MDPI journal article supplement (doi:10.3390/plants12213758), 2023-11-02
Supplement: s1 [file s1]

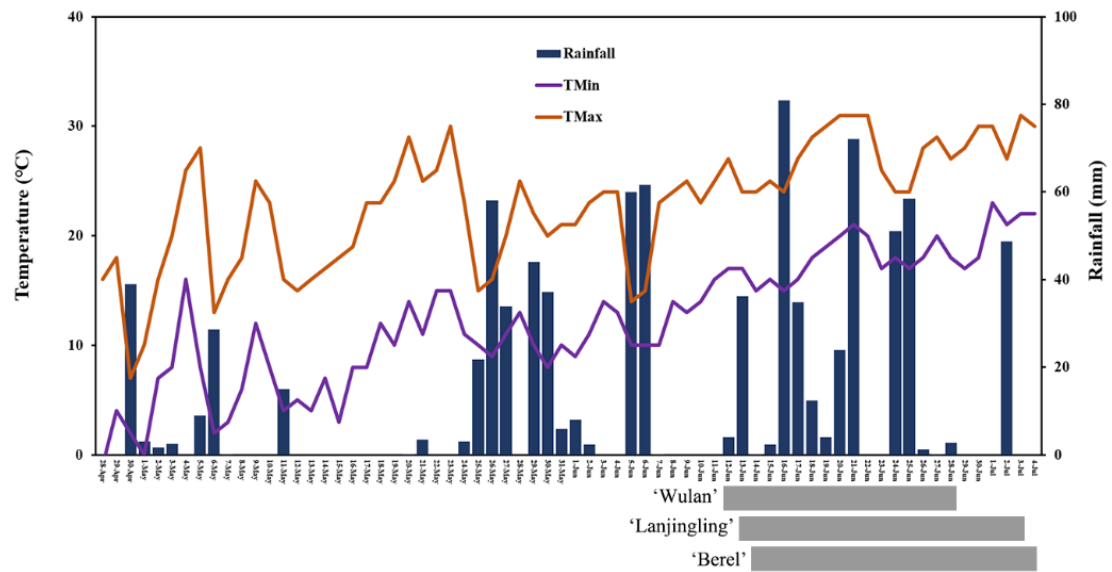

**Figure S1.** Maximum and minimum daily temperatures (TMax and TMin) and average daily rainfall capacity during the period from flowering to harvesting of the three blue honeysuckle cultivars in 2022

**Note:** Data was accessed on August 1, 2023 via <https://rp5.ru/>

**Supplementary File S1.** Extraction and determination methods for total anthocyanins, vitamin C, and phenolics

**Total anthocyanins:** 20  $\mu$ L aliquot of raw juice was extracted with 180  $\mu$ L of pH 4.5 buffer (0.4M sodium acetate) and pH 1.0 buffer (0.0025M potassium chloride). The extractions were performed on an orbital shaker operated at 400 rpm at room temperature for 1 h for adequate for complete extraction. The samples were then centrifuged at 8,000 rpm for 10 min. The supernatant was recovered and filtered through a 0.45  $\mu$ m cellulose syringe filter before analysis, followed by measurement of absorbance values at 510 nm and 700 nm after a reaction time of 30 minutes at room temperature.

**Total vitamin C:** 4 g of raw juice was ground using oxalate-EDTA in a mortar, and the resulting volume was adjusted to 25 ml. Following centrifugation, 1 ml of supernatant was collected and combined with 4.0 mL of oxalate-EDTA, 1.0 mL of 5% H<sub>2</sub>SO<sub>4</sub>, 0.5 mL of metaphosphate-acetic acid, and 2.0 mL of a 5% ammonium molybdate solution. The mixture was incubated at a temperature of 30 °C for a duration of 15 minutes before measuring the absorbance at a wavelength of 705 nm.

**Total phenolics:** 20  $\mu$ L aliquot of raw juice was vortexed with 90  $\mu$ L of deionized water and 10  $\mu$ L of FC reagent for 5 minutes under dark conditions. Subsequently, the mixture was further vortexed after adding 80  $\mu$ L of Na<sub>2</sub>CO<sub>3</sub>. A gallic acid standard solution (0–200 mg/mL) underwent the same treatment procedure. The mixtures were left at room temperature for 2 hours before measuring the absorbance of the developed color at a wavelength of 765 nm.
