# Supplementary material for: Evaluation of the Harvest Dates for Three Major Cultivars of Blue Honeysuckle (Lonicera caerulea L.) in China
Source: Plants (Basel). 2023 Nov 2;12(21):3758. doi: 10.3390/plants12213758 (PMC10649999; doi:10.3390/plants12213758)
Supplement: Supplementary file 1 [file plants-12-03758-s001.zip › Supplementary_Dataset.xlsx]

## Sheet: Table S1
Table S1. Raw data of the 17 agronomic traits of 'Lanjingling', 'Wulan' and 'Berel' harvested at 5 dates within their respective harvest windows
Lanjingling	Length(mm)	Width(mm)	Size(cm3)	Weight(g)	L*	a*	b*	Ff(N)	Ri(CO2, mg/kg·h)	25℃−Sl(day)	4℃−Sl(day)	SS(%)	TA(%)	SS: TA	Antho(mg/100g)	VC(mg/100g)	Pheno(mg/g)
47DAF-1	22.91	9.22	1.53	1.28	33.26	−1.29	−4.94	3.73	40.55	15	30	15.63	1.44	10.84	254.08	90.99	33.72
47DAF-2	24.02	9.64	1.75	1.12	35.11	−1.56	−5.41	3.88	40.6	12	26	15.13	1.59	9.49	284.42	92.52	37.68
47DAF-3	22.32	9.64	1.63	1.15	33.6	−1.22	−5.27	3.99	42.83	10	23	14.7	1.52	9.67	292	91.76	41.37
52DAF-1	23.62	9.61	1.71	1.14	37.25	−1.38	−5.2	3.09	36.51	12	24	15.33	1.17	13.16	250.29	89.46	26.11
52DAF-2	23.41	9.8	1.76	1.22	34.67	−1.43	−5.45	2.86	40.65	8	21	14.77	1.18	12.51	223.74	90.22	25.12
52DAF-3	23.32	9.27	1.57	1.2	36.64	−1.34	−5.71	2.8	44.41	7	19	15.2	1.19	12.83	276.83	90.99	24.42
57DAF-1	23.65	9.33	1.62	1.19	37.19	−1.24	−6.6	2.19	28.77	11	21	14.25	1.23	11.59	238.91	90.99	26.84
57DAF-2	24.36	9.51	1.73	1.27	38.54	−1.23	−6.42	2.26	26.59	8	17	14.4	1.12	12.82	263.46	92.52	28.64
57DAF-3	22.69	9.99	1.78	1.06	40.69	−1.88	−6.96	2.18	28.45	6	15	13.8	1.07	12.9	257.87	94.06	27.27
62DAF-1	23.47	9.93	1.82	1.18	39.32	−1.47	−6.83	2.12	24.13	9	16	14.7	1.19	12.41	254.08	86.39	34.52
62DAF-2	23.74	9.44	1.66	1.17	39.58	−1.41	−6.91	2.03	19.98	5	15	15.25	1.02	14.98	219.95	89.46	34.87
62DAF-3	24.14	9.47	1.7	1.23	39.46	−1.52	−6.58	2.26	23.49	4	13	13.37	1.07	12.46	227.53	89.46	37.33
67DAF-1	23.79	9.92	1.84	1.25	38.41	−1.46	−6.33	1.47	13.51	6	15	13.93	0.88	15.76	265.46	97.13	27.22
67DAF-2	23.73	9.48	1.67	1.13	36.93	−1.36	−6.39	1.37	13.59	4	10	14.15	0.84	16.89	254.08	100.96	31.29
67DAF-3	23.38	9.56	1.68	1.2	39.85	−1.62	−6.36	1.47	10.18	3	8	13.43	0.87	15.39	242.7	100.96	28.13
Wulan	Length(mm)	Width(mm)	Size(cm3)	Weight(g)	L*	a*	b*	Ff(N)	Ri(CO2, mg/kg·h)	25℃−Sl(day)	4℃−Sl(day)	SS(%)	TA(%)	SS: TA	Antho(mg/100g)	VC(mg/100g)	Pheno(mg/g)
46DAF-1	17.66	10.18	1.92	1.04	31.65	−1.23	−5.11	2.29	80.51	15	21	16.22	2.06	7.87	280.63	118.61	36.56
46DAF-2	18.48	10.57	2.16	1	31.36	−1.43	−6.19	2.18	83.72	10	22	17.63	2.13	8.28	269.25	122.44	36.45
46DAF-3	18.76	10.37	2.11	1.01	32.92	−1.41	−5.45	2.22	77.99	9	20	17.85	2.17	8.23	216.16	122.44	36.56
50DAF-1	19.85	10.94	2.49	1.08	27.94	−0.9	−3.75	1.82	79.56	12	21	17	1.98	8.59	242.7	132.15	29.91
50DAF-2	19.83	10.58	2.32	1.07	29.32	−1.27	−4.68	2.03	83.24	7	19	15.63	1.88	8.31	227.53	140.59	33.02
50DAF-3	19.76	10.09	2.11	0.98	29.06	−0.94	−4.25	1.91	78.09	5	17	15.76	2.05	7.69	238.91	139.06	37.31
54DAF-1	20.54	10.68	2.45	1.07	37.21	−1.78	−6.44	1.74	59.36	6	15	15.27	1.92	7.95	329.92	183.56	31.18
54DAF-2	19.73	10.77	2.4	1.09	36.98	−1.92	−6.94	1.78	55.06	4	13	16.81	2.02	8.32	288.21	196.6	28.55
54DAF-3	19.73	10.49	2.27	1.02	37.53	−1.82	−7.03	1.51	58.25	3	13	18.63	1.79	10.41	318.55	193.53	31.93
58DAF-1	20.37	10.92	2.55	1.05	35.53	−1.58	−7.04	1.26	53.94	3	12	17.35	1.71	10.15	322.34	107.1	30.47
58DAF-2	19.85	10.62	2.35	1.09	36.17	−1.74	−6.88	1.14	47.23	3	9	17.94	2.01	8.93	299.59	108.64	25.86
58DAF-3	19.87	10.64	2.35	1.05	37.82	−1.89	−7.81	1.13	46.72	3	11	16.93	1.83	9.25	295.79	108.64	33.04
62DAF-1	20.12	10.79	2.45	1.06	31.97	−0.94	−5.23	0.85	50.49	3	6	17.74	1.86	9.54	257.87	114.01	26.13
62DAF-2	20.12	10.65	2.39	1.05	33.3	−1.16	−5.84	0.88	45.39	2	4	17.03	1.63	10.45	257.87	117.07	24.2
62DAF-3	19.93	10.8	2.43	1.09	29.38	−0.92	−5.13	0.9	48.01	2	5	18.18	1.7	10.69	254.08	119.38	25.88
Berel	Length(mm)	Width(mm)	Size(cm3)	Weight(g)	L*	a*	b*	Ff(N)	Ri(CO2, mg/kg·h)	25℃−Sl	4℃−Sl	SS(%)	TA(%)	SS: TA	Antho(mg/100g)	VC(mg/100g)	Pheno(mg/g)
47DAF-1	17.29	10.92	2.16	1.11	28.08	−0.9	−3.39	2.93	46.67	12	27	11.78	2.15	5.49	254.08	88.69	48.15
47DAF-2	17.29	11.07	2.22	1.13	29.45	−1.01	−3.74	2.93	48.44	15	23	13.3	2.3	5.77	254.08	90.22	48.65
47DAF-3	17.39	11.15	2.26	1.11	27.24	−0.82	−3.82	2.96	50.26	9	24	13.55	2.24	6.05	212.36	90.22	53.19
52DAF-1	17.48	10.84	2.15	1.1	31.29	−1.31	−4.09	2.48	42.18	9	18	14.4	2.07	6.97	345.09	115.54	39.22
52DAF-2	17.29	10.81	2.12	1.11	29.69	−1.23	−3.75	2.54	42.67	6	15	13	1.99	6.54	326.13	128.58	40.38
52DAF-3	17.29	11.33	2.32	1.15	29.73	−1.14	−4.14	2.54	36.95	6	15	13.17	2.12	6.2	333.72	117.07	40.17
57DAF-1	17.4	11.29	2.32	1.1	35.19	−1.83	−5.37	2.11	37.53	6	14	16.55	2.64	6.28	284.42	101.73	38.34
57DAF-2	17.53	11.07	2.25	1.14	34.85	−1.61	−5.31	1.98	35.69	3	18	16.4	2.49	6.59	310.96	104.03	39.1
57DAF-3	17.19	10.8	2.1	1.16	33.69	−1.64	−5.03	1.95	40.28	3	15	16.5	2.39	6.9	329.92	105.57	38.78
62DAF-1	17.32	10.92	2.16	1.17	32.39	−1.6	−4.46	1.75	26.11	6	15	14.02	1.92	7.32	244.49	100.2	36.95
62DAF-2	17.39	11.45	2.39	1.12	32.42	−1.49	−5.12	2.08	25.01	4	12	14.65	2.07	7.06	242.7	101.73	40.11
62DAF-3	17.44	10.79	2.13	1.14	32.11	−1.47	−4.95	1.88	27.05	3	11	14.25	2.08	6.85	219.95	102.5	35.93
67DAF-1	17.54	10.81	2.15	1.15	32.16	−1.42	−5.24	1.32	21.36	3	15	13.38	1.76	7.6	307.17	104.03	40.45
67DAF-2	17.4	11.2	2.29	1.15	32.65	−1.41	−5.27	1.35	25.38	2	11	13.2	1.91	6.9	292	107.87	43.62
67DAF-3	17.27	11.29	2.3	1.16	32.83	−1.4	−4.68	1.34	20.33	2	11	13.13	1.92	6.83	273.04	109.4	39.77

## Sheet: Table S2
Table S2. R and P value matrixes of the fruit traits of ‘Lanjingling’
r Value	Length	Width	Size	Weight	L*	a*	b*	Ff	Ri	25℃-Sl	4℃-Sl	SS	TA	SS: TA	Antho	Vc	Pheno
Length	1	−0.140593888326039	0.301617	0.318344	0.341071	0.102831	−0.299862885533615	−0.37972768385578	−0.377594301219375	−0.223009022962402	−0.260759771280002	−0.158953144248569	−0.315393688539997	0.294531	−0.302776491106138	0.00612192	−0.117327023414662
Width	−0.140593888326039	1	0.900749	−0.37040876942396	0.327169	−0.584016943294665	−0.268727014285358	−0.196491074645251	−0.202453625745293	−0.195005476457674	−0.233077657198422	−0.32188224492228	−0.169536529233005	0.102458	0.0959403	0.0407595	−0.0534546071807749
Size	0.301617	0.900749	1	−0.198190126406161	0.470093	−0.514066495642824	−0.397643454103354	−0.361503111222629	−0.370287587719083	−0.276242336145525	−0.335723391238882	−0.383789782984969	−0.300713853601995	0.224826	−0.0380983592772362	0.0389578	−0.100929876038008
Weight	0.318344	−0.37040876942396	−0.198190126406161	1	−0.176374602949699	0.512682	0.161495	−0.0536794501525807	−0.052175284391546	0.0955059	0.102959	0.0374699	−0.0641031534372483	0.0303504	−0.208355704763749	−0.109132153375252	−0.106856568073397
L*	0.341071	0.327169	0.470093	−0.176374602949699	1	−0.560717820123928	−0.874197728880394	−0.77328167589625	−0.715889585256651	−0.68230405605373	−0.772715121294557	−0.602433936240423	−0.710534083696144	0.568517	−0.384092619437572	0.139469	−0.237413554706418
a*	0.102831	−0.584016943294665	−0.514066495642824	0.512682	−0.560717820123928	1	0.387489	0.275526	0.284486	0.407471	0.388744	0.450817	0.281413	−0.185978351103443	0.130463	−0.230389260486739	0.102912
b*	−0.299862885533615	−0.268727014285358	−0.397643454103354	0.161495	−0.874197728880394	0.387489	1	0.801694	0.730305	0.671512	0.769404	0.612528	0.638931	−0.506914918230241	0.394238	−0.126609026128686	0.0872311
Ff	−0.37972768385578	−0.196491074645251	−0.361503111222629	−0.0536794501525807	−0.77328167589625	0.275526	0.801694	1	0.903994	0.779819	0.888041	0.661062	0.944501	−0.875796357011211	0.455985	−0.490585160276339	0.410666
Ri	−0.377594301219375	−0.202453625745293	−0.370287587719083	−0.052175284391546	−0.715889585256651	0.284486	0.730305	0.903994	1	0.712563	0.844639	0.674085	0.841696	−0.809074678993602	0.385033	−0.574906016914338	0.0888531
25℃−Sl	−0.223009022962402	−0.195005476457674	−0.276242336145525	0.0955059	−0.68230405605373	0.407471	0.671512	0.779819	0.712563	1	0.949024	0.710057	0.814482	−0.736823925638101	0.337975	−0.492799498629337	0.139521
4℃−Sl	−0.260759771280002	−0.233077657198422	−0.335723391238882	0.102959	−0.772715121294557	0.388744	0.769404	0.888041	0.844639	0.949024	1	0.766166	0.867028	−0.78135930162595	0.331026	−0.530755629120435	0.164226
SS	−0.158953144248569	−0.32188224492228	−0.383789782984969	0.0374699	−0.602433936240423	0.450817	0.612528	0.661062	0.674085	0.710057	0.766166	1	0.600127	−0.40263300925044	0.199758	−0.519940690235466	0.0880879
TA	−0.315393688539997	−0.169536529233005	−0.300713853601995	−0.0641031534372483	−0.710534083696144	0.281413	0.638931	0.944501	0.841696	0.814482	0.867028	0.600127	1	−0.954878030090292	0.485687	−0.533193638029927	0.480485
SS: TA	0.294531	0.102458	0.224826	0.0303504	0.568517	−0.185978351103443	−0.506914918230241	−0.875796357011211	−0.809074678993602	−0.736823925638101	−0.78135930162595	−0.40263300925044	−0.954878030090292	1	−0.400907590836657	0.592029	−0.433848292888261
Antho	−0.302776491106138	0.0959403	−0.0380983592772362	−0.208355704763749	−0.384092619437572	0.130463	0.394238	0.455985	0.385033	0.337975	0.331026	0.199758	0.485687	−0.400907590836657	1	0.152539	0.230309
Vc	0.00612192	0.0407595	0.0389578	−0.109132153375252	0.139469	−0.230389260486739	−0.126609026128686	−0.490585160276339	−0.574906016914338	−0.492799498629337	−0.530755629120435	−0.519940690235466	−0.533193638029927	0.592029	0.152539	1	−0.210461359151357
Pheno	−0.117327023414662	−0.0534546071807749	−0.100929876038008	−0.106856568073397	−0.237413554706418	0.102912	0.0872311	0.410666	0.0888531	0.139521	0.164226	0.0880879	0.480485	−0.433848292888261	0.230309	−0.210461359151357	1
p Value	Length	Width	Size	Weight	L*	a*	b*	Ff	Ri	25℃-Sl	4℃-Sl	SS	TA	SS: TA	Antho	Vc	Pheno
Length	1	0.617235	0.274608	0.247527	0.213468	0.71535	0.277547	0.162701	0.165271	0.424338	0.347892	0.571507	0.252179	0.286596	0.272676	0.982725	0.677097
Width	0.617235	1	4.64824559289032E−06	0.174125	0.233927	0.0222555	0.332816	0.482757	0.469298	0.486138	0.403156	0.242017	0.545812	0.716343	0.733762	0.885323	0.849934
Size	0.274608	4.64824559289032E−06	1	0.478903	0.0770205	0.0499535	0.14216	0.185522	0.174277	0.318941	0.221198	0.157881	0.276119	0.420473	0.892769	0.890364	0.720416
Weight	0.247527	0.174125	0.478903	1	0.529483	0.05068	0.565289	0.84931	0.85349	0.734928	0.715009	0.894529	0.820452	0.914494	0.456158	0.698639	0.704659
L*	0.213468	0.233927	0.0770205	0.529483	1	0.0296752	2.03107e-05	0.000721358	0.00268623	0.00507181	0.00073207	0.0174674	0.00298963	0.0270101	0.157525	0.620082	0.394209
a*	0.71535	0.0222555	0.0499535	0.05068	0.0296752	1	0.153575	0.32025	0.304111	0.131672	0.152132	0.0916946	0.309591	0.506927	0.643052	0.408756	0.715133
b*	0.277547	0.332816	0.14216	0.565289	2.03107e-05	0.153575	1	0.000325284	0.00199015	0.00611905	0.000797291	0.0152037	0.0103442	0.0537891	0.145922	0.652976	0.757227
Ff	0.162701	0.482757	0.185522	0.84931	0.000721358	0.32025	0.000325284	1	3.7753e-06	0.000606701	9.85541063276701E−06	0.00728887	1.18324126814453E−07	1.87656e-05	0.0875816	0.06335	0.128378
Ri	0.165271	0.469298	0.174277	0.85349	0.00268623	0.304111	0.00199015	3.7753e-06	1	0.00287161	7.43159e-05	0.00585511	8.33311e-05	0.000259097	0.156425	0.0249654	0.752841
25℃−Sl	0.424338	0.486138	0.318941	0.734928	0.00507181	0.131672	0.00611905	0.000606701	0.00287161	1	6.88522940796219E−08	0.00301794	0.000217973	0.00172721	0.217923	0.0619862	0.619951
4℃−Sl	0.347892	0.403156	0.221198	0.715009	0.00073207	0.152132	0.000797291	9.85541063276701E−06	7.43159e-05	6.88522940796219E−08	1	0.000865543	2.86001e-05	0.000581971	0.228133	0.0417895	0.558643
SS	0.571507	0.242017	0.157881	0.894529	0.0174674	0.0916946	0.0152037	0.00728887	0.00585511	0.00301794	0.000865543	1	0.0180193	0.136767	0.47536	0.0469567	0.754909
TA	0.252179	0.545812	0.276119	0.820452	0.00298963	0.309591	0.0103442	1.18324126814453E−07	8.33311e-05	0.000217973	2.86001e-05	0.0180193	1	3.1602e-08	0.0664436	0.0406854	0.0698478
SS: TA	0.286596	0.716343	0.420473	0.914494	0.0270101	0.506927	0.0537891	1.87656e-05	0.000259097	0.00172721	0.000581971	0.136767	3.1602e-08	1	0.138616	0.0200631	0.106157
Antho	0.272676	0.733762	0.892769	0.456158	0.157525	0.643052	0.145922	0.0875816	0.156425	0.217923	0.228133	0.47536	0.0664436	0.138616	1	0.587321	0.408924
Vc	0.982725	0.885323	0.890364	0.698639	0.620082	0.408756	0.652976	0.06335	0.0249654	0.0619862	0.0417895	0.0469567	0.0406854	0.0200631	0.587321	1	0.451514
Pheno	0.677097	0.849934	0.720416	0.704659	0.394209	0.715133	0.757227	0.128378	0.752841	0.619951	0.558643	0.754909	0.0698478	0.106157	0.408924	0.451514	1

## Sheet: Table S3
Table S3. R and P value matrixes of the fruit traits of ‘Wulan’
r Value	Length	Width	Size	Weight	L*	a*	b*	Ff	Ri	25℃-Sl	4℃-Sl	SS	TA	SS: TA	Antho	Vc	Pheno
Length	1	0.603008	0.869591	0.431018	0.249572	−0.0932673803065443	−0.185673525909274	−0.66497873392824	−0.612115511389102	−0.754766859370812	−0.606606250872612	−0.058905907587147	−0.638471754198285	0.437647	0.275035	0.176812	−0.626323548879367
Width	0.603008	1	0.916939	0.7028	0.140204	−0.0752697644533866	−0.208557209517365	−0.536439614984873	−0.481852155867908	−0.34764282527419	−0.406508773492639	0.272617	−0.493396055036549	0.496034	0.247322	−0.033968644295336	−0.692044186429183
Size	0.869591	0.916939	1	0.6539	0.209592	−0.0871984594936523	−0.215840815418094	−0.661945447736274	−0.603351942107371	−0.583088355885072	−0.552447914351617	0.129389	−0.62390810287845	0.520689	0.299567	0.0598982	−0.741713025648412
Weight	0.431018	0.7028	0.6539	1	0.137301	−0.110123481348305	−0.102790591522623	−0.437587200183411	−0.485297845687074	−0.227974990442861	−0.422974881638643	0.00586771	−0.355346954518653	0.247842	0.204838	0.0554385	−0.739287225372351
L*	0.249572	0.140204	0.209592	0.137301	1	−0.913678127812904	−0.931639765438063	−0.256680592569202	−0.5906052976504	−0.44051154203403	−0.306900369307119	0.1574	−0.166435147096095	0.191052	0.796917	0.353636	−0.165763530894054
a*	−0.0932673803065443	−0.0752697644533866	−0.0871984594936523	−0.110123481348305	−0.913678127812904	1	0.890262	−0.0409632659898334	0.315037	0.243136	0.0037206	−0.0528137824239911	−0.0570663014315894	0.0374105	−0.709602871027872	−0.433599912637957	−0.0575943679345765
b*	−0.185673525909274	−0.208557209517365	−0.215840815418094	−0.102790591522623	−0.931639765438063	0.890262	1	0.316332	0.602518	0.488315	0.337598	−0.2870097309338	0.223606	−0.305464311163169	−0.766105882375884	−0.16342951104775	0.156108
Ff	−0.66497873392824	−0.536439614984873	−0.661945447736274	−0.437587200183411	−0.256680592569202	−0.0409632659898334	0.316332	1	0.906756	0.812722	0.95322	−0.412889387127806	0.783543	−0.804891682017493	−0.261493139666475	0.282382	0.831969
Ri	−0.612115511389102	−0.481852155867908	−0.603351942107371	−0.485297845687074	−0.5906052976504	0.315037	0.602518	0.906756	1	0.832566	0.929345	−0.372451302673761	0.679466	−0.703615702316566	−0.500458835015049	0.0542165	0.784131
25℃−Sl	−0.754766859370812	−0.34764282527419	−0.583088355885072	−0.227974990442861	−0.44051154203403	0.243136	0.488315	0.812722	0.832566	1	0.855506	−0.308500144805697	0.664717	−0.661746312530933	−0.298365073613982	−0.0640273937260538	0.622858
4℃−Sl	−0.606606250872612	−0.406508773492639	−0.552447914351617	−0.422974881638643	−0.306900369307119	0.0037206	0.337598	0.95322	0.929345	0.855506	1	−0.367385287863138	0.74946	−0.763049529233667	−0.239384294519517	0.156602	0.836569
SS	−0.058905907587147	0.272617	0.129389	0.00586771	0.1574	−0.0528137824239911	−0.2870097309338	−0.412889387127806	−0.372451302673761	−0.308500144805697	−0.367385287863138	1	−0.174177518258462	0.654347	0.0556223	−0.20048423679594	−0.332429068057579
TA	−0.638471754198285	−0.493396055036549	−0.62390810287845	−0.355346954518653	−0.166435147096095	−0.0570663014315894	0.223606	0.783543	0.679466	0.664717	0.74946	−0.174177518258462	1	−0.856429599423692	−0.289314610217455	0.0902107	0.647315
SS: TA	0.437647	0.496034	0.520689	0.247842	0.191052	0.0374105	−0.305464311163169	−0.804891682017493	−0.703615702316566	−0.661746312530933	−0.763049529233667	0.654347	−0.856429599423692	1	0.232983	−0.182704519634574	−0.657140028261685
Antho	0.275035	0.247322	0.299567	0.204838	0.796917	−0.709602871027872	−0.766105882375884	−0.261493139666475	−0.500458835015049	−0.298365073613982	−0.239384294519517	0.0556223	−0.289314610217455	0.232983	1	0.320537	−0.182290843498556
Vc	0.176812	−0.033968644295336	0.0598982	0.0554385	0.353636	−0.433599912637957	−0.16342951104775	0.282382	0.0542165	−0.0640273937260538	0.156602	−0.20048423679594	0.0902107	−0.182704519634574	0.320537	1	0.0649881
Pheno	−0.626323548879367	−0.692044186429183	−0.741713025648412	−0.739287225372351	−0.165763530894054	−0.0575943679345765	0.156108	0.831969	0.784131	0.622858	0.836569	−0.332429068057579	0.647315	−0.657140028261685	−0.182290843498556	0.0649881	1
p Value	Length	Width	Size	Weight	L*	a*	b*	Ff	Ri	25℃-Sl	4℃-Sl	SS	TA	SS: TA	Antho	Vc	Pheno
Length	1	0.0173321	2.53639e-05	0.108715	0.369694	0.740941	0.507636	0.00683145	0.0152916	0.00114455	0.0165024	0.834816	0.0104168	0.102789	0.321147	0.528446	0.0124843
Width	0.0173321	1	1.52052060563433E−06	0.00347546	0.618221	0.789773	0.455712	0.0392494	0.0689412	0.204204	0.132674	0.325592	0.0616225	0.0600329	0.374166	0.904341	0.00425348
Size	2.53639e-05	1.52052060563433E−06	1	0.00818713	0.453428	0.757315	0.439759	0.00718362	0.0172515	0.022521	0.0327129	0.645812	0.0129308	0.0465847	0.278044	0.832069	0.00154898
Weight	0.108715	0.00347546	0.00818713	1	0.625582	0.696021	0.715457	0.102842	0.0666942	0.41382	0.116217	0.983442	0.193677	0.37313	0.463967	0.844427	0.00163546
L*	0.369694	0.618221	0.453428	0.625582	1	1.93727058869663E−06	4.44433990301085E−07	0.355756	0.0204402	0.100301	0.26587	0.575321	0.553289	0.495194	0.000375049	0.195984	0.554914
a*	0.740941	0.789773	0.757315	0.696021	1.93727058869663E−06	1	8.7e-06	0.884754	0.252745	0.382566	0.9895	0.851715	0.839912	0.894695	0.00304507	0.10638	0.838449
b*	0.507636	0.455712	0.439759	0.715457	4.44433990301085E−07	8.7e-06	1	0.250693	0.0174475	0.0647707	0.218469	0.299653	0.423067	0.268228	0.000866858	0.560578	0.5785
Ff	0.00683145	0.0392494	0.00718362	0.102842	0.355756	0.884754	0.250693	1	3.14424455829033E−06	0.00023072	3.97950376016395E−08	0.12612	0.000548322	0.000295091	0.346489	0.307857	0.000119779
Ri	0.0152916	0.0689412	0.0172515	0.0666942	0.0204402	0.252745	0.0174475	3.14424455829033E−06	1	0.000117219	5.47742837691505E−07	0.171577	0.00533229	0.00342142	0.0574332	0.847818	0.000539534
25℃−Sl	0.00114455	0.204204	0.022521	0.41382	0.100301	0.382566	0.0647707	0.00023072	0.000117219	1	4.768e-05	0.263257	0.00686132	0.00720723	0.280072	0.820661	0.0131288
4℃−Sl	0.0165024	0.132674	0.0327129	0.116217	0.26587	0.9895	0.218469	3.97950376016395E−08	5.47742837691505E−07	4.768e-05	1	0.177941	0.00129713	0.000935646	0.390178	0.577284	0.000101183
SS	0.834816	0.325592	0.645812	0.983442	0.575321	0.851715	0.299653	0.12612	0.171577	0.263257	0.177941	1	0.534706	0.00812864	0.843916	0.473723	0.226047
TA	0.0104168	0.0616225	0.0129308	0.193677	0.553289	0.839912	0.423067	0.000548322	0.00533229	0.00686132	0.00129713	0.534706	1	4.58402e-05	0.295615	0.749176	0.00908765
SS: TA	0.102789	0.0600329	0.0465847	0.37313	0.495194	0.894695	0.268228	0.000295091	0.00342142	0.00720723	0.000935646	0.00812864	4.58402e-05	1	0.403353	0.514566	0.00777061
Antho	0.321147	0.374166	0.278044	0.463967	0.000375049	0.00304507	0.000866858	0.346489	0.0574332	0.280072	0.390178	0.843916	0.295615	0.403353	1	0.244102	0.515535
Vc	0.528446	0.904341	0.832069	0.844427	0.195984	0.10638	0.560578	0.307857	0.847818	0.820661	0.577284	0.473723	0.749176	0.514566	0.244102	1	0.818011
Pheno	0.0124843	0.00425348	0.00154898	0.00163546	0.554914	0.838449	0.5785	0.000119779	0.000539534	0.0131288	0.000101183	0.226047	0.00908765	0.00777061	0.515535	0.818011	1

## Sheet: Table S4
Table S4. R and P value matrixes of the fruit traits of ‘Berel’
r Value	Length	Width	Size	Weight	L*	a*	b*	Ff	Ri	25℃-Sl	4℃-Sl	SS	TA	SS: TA	Antho	Vc	Pheno
Length	1	−0.0753209348075866	0.0758243	−0.214392671087581	0.272941	−0.210802696933025	−0.431176067253619	−0.260391670368962	−0.270707353073811	−0.225427305679041	−0.0925143411959957	0.206311	−0.0703527535852833	0.371284	0.0106212	−0.0261346845647982	−0.152419450722482
Width	−0.0753209348075866	1	0.987896	−0.048130618237061	0.108318	−0.0238282737780896	−0.202705810182387	−0.0236112317760493	−0.178185688503556	−0.0907993772229023	−0.193923678488535	0.0450668	0.187718	−0.203076796473831	−0.188315001920028	−0.101493022428544	0.153561
Size	0.0758243	0.987896	1	−0.0837495123929771	0.153639	−0.0608994509033098	−0.277268962493794	−0.068029645602701	−0.226028466817101	−0.132560523497408	−0.219162665869538	0.0754748	0.171705	−0.141556812600521	−0.186597195643715	−0.100102511671153	0.12686
Weight	−0.214392671087581	−0.048130618237061	−0.0837495123929771	1	0.331704	−0.31512373567898	−0.37015338230315	−0.652255682336223	−0.607261033523544	−0.519094442866615	−0.445471969162099	0.0114329	−0.366364431356546	0.486711	0.040466	0.0547146	−0.358407141912327
L*	0.272941	0.108318	0.153639	0.331704	1	−0.963034085425232	−0.88926244618511	−0.723573822916344	−0.576224136793227	−0.675627864529904	−0.665259704776217	0.764166	0.256817	0.561599	0.275482	0.199119	−0.747842016399118
a*	−0.210802696933025	−0.0238282737780896	−0.0608994509033098	−0.31512373567898	−0.963034085425232	1	0.845944	0.696554	0.577553	0.675088	0.711906	−0.759036662597529	−0.20153092662679	−0.629389234404329	−0.246812192147613	−0.260422809531633	0.831355
b*	−0.431176067253619	−0.202705810182387	−0.277268962493794	−0.37015338230315	−0.88926244618511	0.845944	1	0.799566	0.691781	0.797723	0.714611	−0.654992394797729	−0.105780253915418	−0.636627646525599	−0.114167246006362	−0.0927900840028881	0.591803
Ff	−0.260391670368962	−0.0236112317760493	−0.068029645602701	−0.652255682336223	−0.723573822916344	0.696554	0.799566	1	0.914384	0.848024	0.791701	−0.219027846034089	0.407859	−0.803065490878005	−0.126617700233587	−0.245309651112601	0.611321
Ri	−0.270707353073811	−0.178185688503556	−0.226028466817101	−0.607261033523544	−0.576224136793227	0.577553	0.691781	0.914384	1	0.775231	0.806159	−0.0354000524315481	0.551287	−0.774648677980181	0.0524619	−0.214142632993103	0.612261
25℃−Sl	−0.225427305679041	−0.0907993772229023	−0.132560523497408	−0.519094442866615	−0.675627864529904	0.675088	0.797723	0.848024	0.775231	1	0.836805	−0.365549043521542	0.236653	−0.719591151884295	−0.209600787101277	−0.444298940644951	0.650834
4℃−Sl	−0.0925143411959957	−0.193923678488535	−0.219162665869538	−0.445471969162099	−0.665259704776217	0.711906	0.714611	0.791701	0.806159	0.836805	1	−0.289249078533136	0.299754	−0.715096715314873	−0.185436640992252	−0.562728654897655	0.767827
SS	0.206311	0.0450668	0.0754748	0.0114329	0.764166	−0.759036662597529	−0.654992394797729	−0.219027846034089	−0.0354000524315481	−0.365549043521542	−0.289249078533136	1	0.684532	0.264943	0.221825	0.0324207	−0.483569630760606
TA	−0.0703527535852833	0.187718	0.171705	−0.366364431356546	0.256817	−0.20153092662679	−0.105780253915418	0.407859	0.551287	0.236653	0.299754	0.684532	1	−0.51869602549721	0.0304785	−0.285734139036038	0.084168
SS: TA	0.371284	−0.203076796473831	−0.141556812600521	0.486711	0.561599	−0.629389234404329	−0.636627646525599	−0.803065490878005	−0.774648677980181	−0.719591151884295	−0.715096715314873	0.264943	−0.51869602549721	1	0.206104	0.382372	−0.666008015248611
Antho	0.0106212	−0.188315001920028	−0.186597195643715	0.040466	0.275482	−0.246812192147613	−0.114167246006362	−0.126617700233587	0.0524619	−0.209600787101277	−0.185436640992252	0.221825	0.0304785	0.206104	1	0.725474	−0.375527924993821
Vc	−0.0261346845647982	−0.101493022428544	−0.100102511671153	0.0547146	0.199119	−0.260422809531633	−0.0927900840028881	−0.245309651112601	−0.214142632993103	−0.444298940644951	−0.562728654897655	0.0324207	−0.285734139036038	0.382372	0.725474	1	−0.558767796444804
Pheno	−0.152419450722482	0.153561	0.12686	−0.358407141912327	−0.747842016399118	0.831355	0.591803	0.611321	0.612261	0.650834	0.767827	−0.483569630760606	0.084168	−0.666008015248611	−0.375527924993821	−0.558767796444804	1
p Value	Length	Width	Size	Weight	L*	a*	b*	Ff	Ri	25℃-Sl	4℃-Sl	SS	TA	SS: TA	Antho	Vc	Pheno
Length	1	0.789633	0.788256	0.442908	0.324993	0.450764	0.108571	0.348598	0.329127	0.419199	0.742968	0.460688	0.803249	0.17303	0.970032	0.926338	0.587618
Width	0.789633	1	6.60563343732925E−12	0.864747	0.70079	0.932825	0.468733	0.933435	0.525196	0.747588	0.488608	0.873291	0.50289	0.467902	0.501507	0.718914	0.584789
Size	0.788256	6.60563343732925E−12	1	0.766663	0.584596	0.8293	0.317072	0.809634	0.417927	0.637675	0.432578	0.789212	0.54061	0.614802	0.505489	0.722624	0.652329
Weight	0.442908	0.864747	0.766663	1	0.227124	0.252607	0.174445	0.00840517	0.0163547	0.0473801	0.0960906	0.967743	0.179242	0.0657884	0.886144	0.846435	0.189595
L*	0.324993	0.70079	0.584596	0.227124	1	8.82029329328143E−09	9.20500633419368E−06	0.00229443	0.0245586	0.00570127	0.00679952	0.000910019	0.355491	0.0293646	0.32033	0.476802	0.00134679
a*	0.450764	0.932825	0.8293	0.252607	8.82029329328143E−09	1	7.05833e-05	0.00391198	0.0241535	0.00575479	0.00290943	0.00103261	0.471368	0.0119348	0.375184	0.348538	0.00012246
b*	0.108571	0.468733	0.317072	0.174445	9.20500633419368E−06	7.05833e-05	1	0.000346741	0.00427412	0.00036624	0.00275633	0.00804481	0.707513	0.0107121	0.685377	0.742225	0.0201228
Ff	0.348598	0.933435	0.809634	0.00840517	0.00229443	0.00391198	0.000346741	1	1.83978316100838E−06	6.49555e-05	0.000436309	0.432868	0.131268	0.000312038	0.652954	0.378191	0.0154617
Ri	0.329127	0.525196	0.417927	0.0163547	0.0245586	0.0241535	0.00427412	1.83978316100838E−06	1	0.000685463	0.000283782	0.900328	0.0331576	0.000696035	0.852693	0.443453	0.0152606
25℃−Sl	0.419199	0.747588	0.637675	0.0473801	0.00570127	0.00575479	0.00036624	6.49555e-05	0.000685463	1	0.000100299	0.180286	0.395772	0.00249132	0.453409	0.0970747	0.00859727
4℃−Sl	0.742968	0.488608	0.432578	0.0960906	0.00679952	0.00290943	0.00275633	0.000436309	0.000283782	0.000100299	1	0.295729	0.277731	0.00272953	0.508187	0.0289699	0.000829958
SS	0.460688	0.873291	0.789212	0.967743	0.000910019	0.00103261	0.00804481	0.432868	0.900328	0.180286	0.295729	1	0.00487447	0.339929	0.426866	0.908682	0.0678145
TA	0.803249	0.50289	0.54061	0.179242	0.355491	0.471368	0.707513	0.131268	0.0331576	0.395772	0.277731	0.00487447	1	0.0475803	0.914134	0.301901	0.765527
SS: TA	0.17303	0.467902	0.614802	0.0657884	0.0293646	0.0119348	0.0107121	0.000312038	0.000696035	0.00249132	0.00272953	0.339929	0.0475803	1	0.461148	0.159552	0.00671508
Antho	0.970032	0.501507	0.505489	0.886144	0.32033	0.375184	0.685377	0.652954	0.852693	0.453409	0.508187	0.426866	0.914134	0.461148	1	0.00220497	0.167786
Vc	0.926338	0.718914	0.722624	0.846435	0.476802	0.348538	0.742225	0.378191	0.443453	0.0970747	0.0289699	0.908682	0.301901	0.159552	0.00220497	1	0.0303715
Pheno	0.587618	0.584789	0.652329	0.189595	0.00134679	0.00012246	0.0201228	0.0154617	0.0152606	0.00859727	0.000829958	0.0678145	0.765527	0.00671508	0.167786	0.0303715	1

## Sheet: Table S5
Table S5. PCA analysis of fruit quality traits of ‘Lanjingling’, ‘Wulan’, and ‘Berel’
Lanjingling
Principal Component Number	Eigenvalue	Percentage of Variance (%)	Cumulative (%)		Loadings							Scores
1	5.7293	52.0846	52.0846		Variable	PC1	PC2	PC3	PC4	PC5		Observation	PC1	PC2	PC3	PC4	PC5
2	1.50969	13.7244	65.809		Size	−0.15613	0.27019	−0.53587	0.47813	0.47029		47DAF-1	1.64097	−1.43518	1.11275	−0.93357	0.21565
3	1.08418	9.85614	75.6651		Weight	0.00693	−0.55511	0.08788	−0.39417	0.68942		47DAF-2	1.49629	1.69419	−0.13828	0.40072	0.2436
4	0.95946	8.72233	84.3874		Ff	0.39844	0.0893	0.04226	−0.03688	−0.02808		47DAF-3	1.38651	1.69606	0.32956	−1.23606	0.00607
5	0.7564	6.8764	91.2638		25−Sl	0.37254	−0.12834	0.08239	0.22446	0.13225		52DAF-1	0.57537	−0.5524	−0.02409	1.7299	−0.78219
6	0.45183	4.10756	95.3714		4−Sl	0.39371	−0.13918	0.08359	0.17531	0.07129		52DAF-2	0.06313	−1.20129	−0.86986	0.86805	0.25402
7	0.2983	2.71181	98.0832		SS	0.30984	−0.2551	0.13072	0.23891	−0.32225		52DAF-3	0.31533	−0.57188	1.46452	0.36474	−0.43294
8	0.14598	1.3271	99.4103		TA	0.40432	0.1421	−0.04258	−0.06492	0.05205		57DAF-1	0.23646	−0.81164	0.0893	0.13099	−0.20316
9	0.04891	0.44464	99.855		SS:TA	−0.37428	−0.1363	0.17639	0.09715	−0.15891		57DAF-2	−0.14546	−0.46796	0.18599	−0.08374	1.61427
10	0.0148	0.13455	99.9895		Antho	0.17967	0.50535	0.43747	0.11916	0.35787		57DAF-3	−0.58254	1.36645	−0.39488	1.34673	−0.69917
11	0.00115	0.01049	100		VC	−0.25377	0.27139	0.60333	−0.0621	0.10604		62DAF-1	0.10982	0.21741	−1.80579	0.4054	0.43146
					Pheno	0.16366	0.37703	−0.29011	−0.6669	−0.09509		62DAF-2	−0.40563	−0.84244	−0.92487	−0.63624	−2.00952
												62DAF-3	−0.54992	−0.10526	−1.63796	−2.00653	0.26214
												67DAF-1	−1.13736	0.0498	0.35018	0.67819	2.07778
												67DAF-2	−1.4193	0.74456	1.2901	−0.25084	−1.12378
												67DAF-3	−1.58367	0.21959	0.97332	−0.77775	0.14577
Wulan
Principal Component Number	Eigenvalue	Percentage of Variance (%)	Cumulative (%)		Loadings							Scores
1	5.92616	53.8742	53.8742		Variable	PC1	PC2	PC3	PC4	PC5		Observation	PC1	PC2	PC3	PC4	PC5
2	1.59134	14.4667	68.3409		Size	−0.31518	0.28699	−0.20179	0.06522	0.00166		46DAF-1	1.56148	−0.17997	−0.23094	0.11082	1.68509
3	1.14954	10.4504	78.7913		Weight	−0.22848	0.37947	−0.50447	0.36573	0.10325		46DAF-2	1.22378	−0.83258	0.6516	0.70012	0.49732
4	0.76926	6.99331	85.7846		Ff	0.39247	0.12058	0.03457	0.13367	−0.06248		46DAF-3	1.27527	−1.36901	−0.04134	0.76651	−1.01567
5	0.61968	5.63345	91.418		25−Sl	0.33873	−0.00772	−0.24983	0.2874	0.32241		50DAF-1	0.38502	0.4062	−1.59652	1.26697	0.08667
6	0.45905	4.17315	95.5912		4−Sl	0.38134	0.08337	−0.0169	0.17466	0.12243		50DAF-2	0.56998	0.58974	−1.26566	−0.90913	−0.80544
7	0.32538	2.95797	98.5491		SS	−0.1787	−0.43922	0.28448	0.72228	−0.07978		50DAF-3	1.16882	−0.44155	0.53706	−2.06775	−1.07238
8	0.11142	1.01293	99.5621		TA	0.34768	−0.00267	−0.06885	0.35705	−0.10229		54DAF-1	0.15506	2.44024	0.28824	−0.70322	0.5129
9	0.03691	0.33554	99.8976		SS:TA	−0.35483	−0.24579	0.2079	0.0863	0.02711		54DAF-2	−0.06413	1.79044	0.08965	0.94366	−1.36188
10	0.01084	0.09851	99.9961		Antho	−0.1383	0.39847	0.5114	0.09946	0.70133		54DAF-3	−0.46178	0.094	2.7631	0.92594	−0.6578
11	0.00042566	0.00387	100		VC	0.04645	0.57487	0.42251	0.16528	−0.58317		58DAF-1	−0.90577	−0.04574	0.54114	−0.42798	1.7699
					Pheno	0.36643	−0.09746	0.26824	−0.19284	0.13031		58DAF-2	−0.70858	−0.09584	−0.52628	1.12792	0.73688
												58DAF-3	−0.42719	−0.28839	0.23232	−0.92513	1.06958
												62DAF-1	−0.99323	−0.65407	−0.59527	0.02555	−0.41819
												62DAF-2	−1.33952	−0.67507	−0.32761	−1.2235	−0.47456
												62DAF-3	−1.43922	−0.7384	−0.5195	0.38921	−0.55243
Berel
Principal Component Number	Eigenvalue	Percentage of Variance (%)	Cumulative (%)		Loadings							Scores
1	4.94922	44.9929	44.9929		Variable	PC1	PC2	PC3	PC4	PC5		Observation	PC1	PC2	PC3	PC4	PC5
2	1.93171	17.561	62.5539		Size	0.00826	0.11411	−0.42604	0.77119	0.19459		47DAF-1	1.95912	−0.82946	0.36236	−0.44495	0.1356
3	1.60577	14.5979	77.1518		Weight	−0.26861	−0.25443	−0.19863	−0.29521	0.72392		47DAF-2	1.7461	−0.23007	−0.19912	−0.42029	0.77869
4	1.04743	9.5221	86.6739		Ff	0.39735	0.12487	0.22809	0.0569	−0.07964		47DAF-3	1.72964	−0.40033	−0.88623	0.18464	−0.38104
5	0.59012	5.36469	92.0386		25−Sl	0.40203	−0.04389	0.16782	−0.0828	−0.03101		52DAF-1	0.02494	0.57782	1.83728	−0.03204	−1.12843
6	0.36313	3.3012	95.3398		4−Sl	0.40759	−0.03332	0.11429	−0.24544	0.17081		52DAF-2	−0.16585	−0.0309	2.28158	0.62286	−0.85616
7	0.24893	2.26302	97.6028		SS	−0.14308	0.60894	−0.21981	−0.26197	−0.06163		52DAF-3	−0.11554	0.14559	0.80492	1.46982	1.77412
8	0.15354	1.39586	98.9987		TA	0.17389	0.62265	−0.18359	−0.11713	0.16202		57DAF-1	0.158	2.2022	−0.83611	0.5966	−0.77456
9	0.08443	0.76751	99.7662		SS:TA	−0.39117	−0.11514	−0.02629	−0.16877	−0.30179		57DAF-2	−0.26657	1.55331	−0.45795	−0.47932	0.95622
10	0.0249	0.22637	99.9926		Antho	−0.16797	0.27383	0.56147	0.07851	0.47507		57DAF-3	−0.68997	1.17706	0.20526	−1.82972	1.14812
11	0.000818878	0.00744	100		VC	−0.26713	0.10545	0.53115	0.33999	−0.01944		62DAF-1	−0.68237	−0.98113	−0.54418	−1.34327	−0.17091
					Pheno	0.37261	−0.21389	−0.0755	0.12325	0.23323		62DAF-2	−0.32279	0.117	−1.25042	1.43882	−1.25536
												62DAF-3	−0.6112	−0.3359	−0.62552	−0.93868	−1.60575
												67DAF-1	−0.99597	−1.21176	0.30787	−0.72995	−0.07277
												67DAF-2	−0.81185	−0.86848	−0.40462	0.99975	0.73997
												67DAF-3	−0.95569	−0.88493	−0.59511	0.90574	0.71226

## Sheet: Table S6
Table S6. Summary of KMO and Bartlett’s test
Lanjingling
KMO and Bartlett's Test
Kaiser-Meyer-Olkin Measure of Sampling Adequacy.		0.633013
Bartlett's Test of Sphericity	Approx. Chi-Square	80.2157
	df	36
	Sig.	3.25586e-05
Wulan
KMO and Bartlett's Test
Kaiser-Meyer-Olkin Measure of Sampling Adequacy.		0.681581
Bartlett's Test of Sphericity	Approx. Chi-Square	106.411
	df	36
	Sig.	7.00435e-09
Berel
KMO and Bartlett's Test
Kaiser-Meyer-Olkin Measure of Sampling Adequacy.		0.668254
Bartlett's Test of Sphericity	Approx. Chi-Square	79.4666
	df	36
	Sig.	4.06181e-05

## Sheet: Table S7
Table S7. Summary of total variance contribution
Lanjingling
Total Variance Explained
Component	Initial Eigenvalues			Extraction Sums of Squared Loadings			Rotation Sums of Squared Loadings
	Total	% of Variance	Cumulative %	Total	% of Variance	Cumulative %	Total	% of Variance	Cumulative %
1	4.27613	47.5126	47.5126	4.27613	47.5126	47.5126	4.17304	46.3671	46.3671
2	1.42124	15.7915	63.3041	1.42124	15.7915	63.3041	1.33185	14.7983	61.1654
3	1.07255	11.9173	75.2213	1.07255	11.9173	75.2213	1.26503	14.0559	75.2213
4	0.921074	10.2342	85.4555
5	0.695834	7.73149	93.187
6	0.300369	3.33743	96.5244
7	0.185475	2.06083	98.5852
8	0.113106	1.25673	99.842
9	0.0142241	0.158045	100
Extraction Method: Principal Component Analysis.
Wulan
Total Variance Explained
Component	Initial Eigenvalues			Extraction Sums of Squared Loadings			Rotation Sums of Squared Loadings
	Total	% of Variance	Cumulative %	Total	% of Variance	Cumulative %	Total	% of Variance	Cumulative %
1	5.06881	56.3201	56.3201	5.06881	56.3201	56.3201	3.91143	43.4604	43.4604
2	1.42441	15.8267	72.1469	1.42441	15.8267	72.1469	2.24964	24.996	68.4563
3	1.05955	11.7727	83.9196	1.05955	11.7727	83.9196	1.3917	15.4633	83.9196
4	0.620263	6.89181	90.8114
5	0.349197	3.87997	94.6914
6	0.317844	3.5316	98.223
7	0.106818	1.18687	99.4099
8	0.0406656	0.45184	99.8617
9	0.0124454	0.138282	100
Extraction Method: Principal Component Analysis.
Berel
Total Variance Explained
Component	Initial Eigenvalues			Extraction Sums of Squared Loadings			Rotation Sums of Squared Loadings
	Total	% of Variance	Cumulative %	Total	% of Variance	Cumulative %	Total	% of Variance	Cumulative %
1	4.70287	52.2541	52.2541	4.70287	52.2541	52.2541	4.13454	45.9394	45.9394
2	1.63786	18.1984	70.4525	1.63786	18.1984	70.4525	2.14703	23.8559	69.7953
3	1.10965	12.3294	82.782	1.10965	12.3294	82.782	1.1688	12.9866	82.782
4	0.583352	6.48169	89.2637
5	0.346212	3.8468	93.1105
6	0.265772	2.95302	96.0635
7	0.209284	2.32538	98.3889
8	0.105035	1.16705	99.5559
9	0.0399678	0.444087	100
Extraction Method: Principal Component Analysis.

## Sheet: Table S8
Table S8. Component matrixes, rotated component matrixes and component score coefficients
Lanjingling
	Component Matrixa					Rotated Component Matrixa					Component Score Coefficient Matrix
		Component					Component					Component
		1	2	3			1	2	3			1	2	3
	Firmness	0.953079	0.103931			SS: TA	−0.923192601001378	−0.114032329817556			Size	0.00299107	−0.264950581535423	−0.573777979266138
	4 −Sl	0.936161	−0.148953914956081			Firmness	0.923037	0.261005			Weight	0.00188937	−0.22137585192035	0.524438
	SS: TA	−0.919253184558152		0.143433		4 −Sl	0.916349	0.10009	0.234626		Firmness	0.207232	0.11862	−0.00211379697028621
	25−Sl	0.889752	−0.13605771602669			25−Sl	0.870991		0.217462		25−Sl	0.198919	0.012181	0.131503
	Phenolics	0.405647	0.380667	−0.234113736143605		Vitamin C	−0.721466711882266	0.581298	0.12324		4 −Sl	0.209148	0.0115043	0.142857
	Weight		−0.747047861998816	0.234243		Phenolics	0.415993	0.17481	−0.400820885872072		SS: TA	−0.230419999453893	0.0122672	0.121789
	Anthocyanins	0.434019	0.655083	0.399957		Anthocyanins	0.319509	0.809239	−0.143242348581808		Anthocyanins	0.00870381	0.599164	−0.0523154226763831
	Size	−0.365933228842469	0.306021	−0.630660071583219		Weight		−0.363371607968509	0.693255		Vitamin C	−0.251516488653757	0.550754	0.207786
	Vitamin C	−0.605631277512743	0.368682	0.609011		Size	−0.270943921398379	−0.275384537890964	−0.689957131483742		Phenolics	0.114386	0.0553531	−0.335015168292704
	Extraction Method: Principal Component Analysis.					Extraction Method: Principal Component Analysis. Rotation Method: Varimax with Kaiser Normalization.					Extraction Method: Principal Component Analysis. Rotation Method: Varimax with Kaiser Normalization. Component Scores.
	a. 3 components extracted.					a. Rotation converged in 8 iterations.
Wulan
	Component Matrixa					Rotated Component Matrixa					Component Score Coefficient Matrix
		Component					Component					Component
		1	2	3			1	2	3			1	2	3
	Firmness	0.952727	0.221656	0.103267		Firmness	0.909638	−0.365055247499333			Size	0.0399857	0.342078	0.0700958
	4 −Sl	0.931039	0.169899	0.160705		4 −Sl	0.903769	−0.323315647253583			Weight	0.261637	0.637354	−0.0456455614821827
	Phenolics	0.914512		−0.290285108382526		25 −Sl	0.87471	−0.140826177360644	−0.22656092820245		Firmness	0.246696	0.0219132	0.08777
	25 −Sl	0.828531		0.387039		SS: TA	−0.861419678016627	0.162251			25 −Sl	0.306789	0.199824	−0.161592590601286
	SS: TA	−0.807545427551276	−0.220872855083251	−0.261524190137421		Weight	−0.101512301490345	0.9559			4 −Sl	0.258241	0.0563004	0.0333493
	Size	−0.791379627630282	0.251039	0.276485		Phenolics	0.626693	−0.726442183417453			SS: TA	−0.292190725846972	−0.155122173169893	−0.0301878765348514
	Vitamin C		0.85752	−0.17615645007038		Size	−0.464945394539414	0.717885	0.184969		Anthocyanins	−0.102320219438979	−0.118894622158721	0.556348
	Anthocyanins	−0.345362066836282	0.633238	−0.384733309673548		Vitamin C	0.235292		0.845854		Vitamin C	0.106054	0.0366439	0.614664
	Weight	−0.604331098325198	0.312883	0.681984		Anthocyanins	−0.292312183616907		0.760336		Phenolics	0.0198552	−0.317314723635598	0.0818932
	Extraction Method: Principal Component Analysis.					Extraction Method: Principal Component Analysis. Rotation Method: Varimax with Kaiser Normalization.					Extraction Method: Principal Component Analysis. Rotation Method: Varimax with Kaiser Normalization. Component Scores.
	a. 3 components extracted.					a. Rotation converged in 5 iterations.
Berel
	Component Matrixa					Rotated Component Matrixa					Component Score Coefficient Matrix
		Component					Component					Component
		1	2	3			1	2	3			1	2	3
	4 −Sl	0.911119	0.116833	−0.259363805324589		Firmness	0.944273				Size	0.0349096	−0.012269587538127	−0.823832716833506
	25 −Sl	0.897566	0.181389	−0.117645784673206		25 −Sl	0.863127	−0.254037774669294	0.206989		Weight	−0.26654734496698	−0.244369905235871	0.261106
	Firmness	0.881188	0.340659			SS: TA	−0.845797955580822	0.22141	0.129099		Firmness	0.263152	0.120702	0.00357654
	SS: TA	−0.85378107937208		−0.206769048067875		4 −Sl	0.826146	−0.353784289006901	0.321523		25 −Sl	0.197829	−0.0133629859547659	0.143584
	Phenolics	0.833635	−0.18748874060992			Weight	−0.756461440338588	−0.184841008020926	0.231509		4 −Sl	0.163355	−0.0830727040360799	0.252326
	Weight	−0.596850843121531	−0.38125953809947	−0.398003240608388		Phenolics	0.686215	−0.50747699706763			SS: TA	−0.21907401671057	−0.024577469265164	0.150248
	Anthocyanins	−0.383643786464134	0.797868			Vitamin C	−0.237063148901413	0.914323			Anthocyanins	0.126536	0.473145	0.0901
	Vitamin C	−0.602700755381354	0.686637	0.242899		Anthocyanins		0.871583	0.168728		Vitamin C	0.0843937	0.475891	−0.0806101570746939
	Size		−0.421087383880675	0.869478		Size		−0.133743518570314	−0.956771681256791		Phenolics	0.11997	−0.167586382002802	−0.0510990346951845
	Extraction Method: Principal Component Analysis.					Extraction Method: Principal Component Analysis. Rotation Method: Varimax with Kaiser Normalization.					Extraction Method: Principal Component Analysis. Rotation Method: Varimax with Kaiser Normalization. Component Scores.
	a. 3 components extracted.					a. Rotation converged in 5 iterations.

## Sheet: Table S9
Table S9. Factor loadings of all the observations and computational formulas for comprehenively scoring
Lanjingling	FC1	FC2	FC3
47DAF-1	1.47755	0.19919	2.08235
47DAF-2	1.35896	1.21994	−1.29223
47DAF-3	1.27362	1.62936	−0.67191
52DAF-1	0.61882	−0.31579	−0.02244
52DAF-2	0.22724	−1.47906	0.25572
52DAF-3	0.00474	0.75297	1.21115
57DAF-1	0.3277	−0.48345	0.86485
57DAF-2	−0.13531	−0.19677	0.60523
57DAF-3	−0.47652	0.43432	−1.49562
62DAF-1	0.39058	−1.16912	−1.43467
62DAF-2	−0.36963	−1.21981	−0.28601
62DAF-3	−0.10764	−1.31141	−0.42982
67DAF-1	−1.13278	0.08991	0.07185
67DAF-2	−1.72339	1.2477	−0.03084
67DAF-3	−1.73395	0.60203	0.57239
COMPUTE Score = (FC1 * 46.367 + FC2 * 14.798 + FC3 * 14.056)/75.221
Wulan	FC1	FC2	FC3
46DAF-1	1.44339	−0.68508	−0.43329
46DAF-2	0.73119	−1.20551	−0.21141
46DAF-3	0.82164	−1.00801	−1.04132
50DAF-1	1.34641	1.53121	−0.68723
50DAF-2	1.02993	0.62852	−0.52133
50DAF-3	0.15822	−1.83386	−0.19118
54DAF-1	0.61865	0.68017	1.94303
54DAF-2	0.589	1.1248	1.51525
54DAF-3	−0.85365	−1.15372	1.96819
58DAF-1	−0.96369	−0.034	0.31638
58DAF-2	−0.49563	0.8716	−0.23276
58DAF-3	−0.7665	−0.4045	−0.10585
62DAF-1	−0.99913	0.51005	−0.78146
62DAF-2	−1.49184	0.14521	−0.75982
62DAF-3	−1.16799	0.8331	−0.77718
COMPUTE Score = (FC1 * 43.46 + FC2 * 24.996 + FC3 * 15.463)/83.920
Berel	FC1	FC2	FC3
47DAF-1	1.65907	−0.97971	0.78046
47DAF-2	1.39565	−1.10003	0.41413
47DAF-3	1.25962	−1.51703	−0.41164
52DAF-1	0.80501	1.64158	0.65526
52DAF-2	0.69352	1.96613	0.51456
52DAF-3	0.37329	1.11472	−0.86532
57DAF-1	0.36662	0.39263	−1.42195
57DAF-2	−0.19864	0.25767	−0.13046
57DAF-3	−0.65485	0.39016	1.43113
62DAF-1	−1.18227	−0.9108	1.09093
62DAF-2	−0.39155	−0.34553	−1.92404
62DAF-3	−0.98147	−0.60207	0.53727
67DAF-1	−1.11585	−0.05321	0.9847
67DAF-2	−0.90054	−0.0715	−0.82258
67DAF-3	−1.12761	−0.18301	−0.83244
COMPUTE Score = (FC1 * 45.939 + FC2 * 23.856 + FC3 * 12.987)/82.782
